# Supplementary material for: Antitumoral and antimetastatic activity of Maitake D-Fraction in triple-negative breast cancer cells
Source: PubMed Central journal article supplement (PMC5955106; doi:10.18632/oncotarget.25174), 2018-05-04
Supplement: oncotarget-09-23396-s001.pdf [file oncotarget-09-23396-s001.pdf]

## Antitumoral and antimetastatic activity of Maitake D-Fraction in triple-negative breast cancer cells

### SUPPLEMENTARY MATERIALS

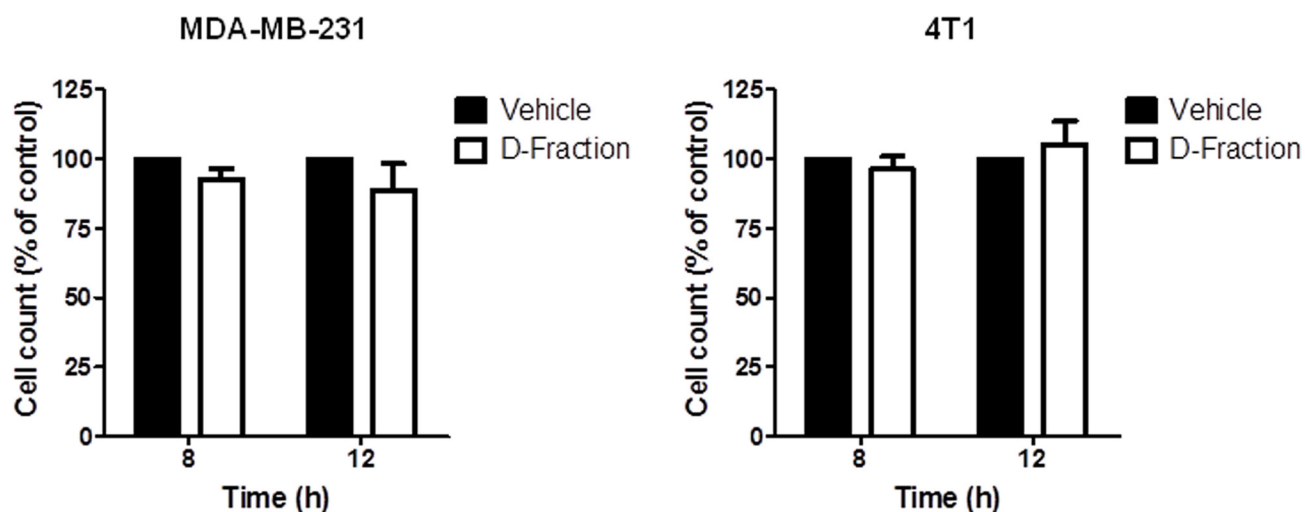

**Supplementary Figure 1: Maitake D-Fraction does not affect the viability of TNBC cells at treatment times that decrease their migration.** Cell count was assessed in MDA-MB-231 and 4T1 cells after 8 or 12 h of treatment with D-Fraction (IC<sub>50</sub>) or vehicle. Data show the percentage of cells in relation to vehicle-treated cells. The bars represent the mean  $\pm$  SEM of two independent experiments.
